# Supplementary material for: A high-entropy layered P2-type cathode with high stability for sodium-ion batteries
Source: Royal Society of Chemistry journal article supplement (doi:10.1039/d3se01597a), 2024-01-01
Supplement: d3se01597a1.pdf [file d3se01597a1.pdf]

## Supplementary Material

### **A high-entropy layered P2-type cathode with high stability for sodium-ion batteries**

Hongfeng Liu,<sup>a</sup> Yingshuai Wang,<sup>a</sup> Xiangyu Ding,<sup>a</sup> Yusong Wang,<sup>a</sup> Feng Wu,<sup>a</sup>  
Hongcai Gao<sup>a,b,c,\*</sup>

<sup>a</sup>School of Materials Science and Engineering, Beijing Institute of Technology, Beijing  
100081, P.R. China

<sup>b</sup>Yangtze Delta Region Academy of Beijing Institute of Technology, Jiaxing, 314019,  
China

<sup>c</sup> Beijing Institute of Technology Chongqing Innovation Center, Chongqing 401120.  
P.R. China

\*Corresponding author: [gaohc@bit.edu.cn](mailto:gaohc@bit.edu.cn) (Prof. Hongcai Gao)

**Table S1:** The refined parameters of NLNMO and NLNBMMO-5%

| $\square$ |                  | NLNMO    | NLNBMMO-5% |
|-----------|------------------|----------|------------|
|           | $a/\text{\AA}$   | 2.89885  | 2.91005    |
|           | $b/\text{\AA}$   | 2.89885  | 2.91005    |
|           | $c/\text{\AA}$   | 11.06831 | 11.11041   |
|           | $V/\text{\AA}^3$ | 80.54    | 80.74      |
|           | $R_p$ (%)        | 3.22     | 4.52       |
|           | $R_{wp}$ (%)     | 8.07     | 7.01       |
|           | Gof              | 1.57     | 1.49       |

**Table S2:** Comparison of electrochemical performances of NLNMO, NLNBMMO-5% and

NLNBMMO-10%

| Sample      | Initial discharge capacity<br>(mA h g <sup>-1</sup> ) | Capacity after cycling<br>(mA h g <sup>-1</sup> ) | Capacity retention |
|-------------|-------------------------------------------------------|---------------------------------------------------|--------------------|
| NLNMO       | 89.8 (1 C)                                            | 77 (1 C)                                          | 85.70%             |
|             | 69.1 (1 C)                                            | 49.6 (5 C)                                        | 75.00%             |
| NLNBMMO-5%  | 102.6 (1 C)                                           | 96.6 (1 C)                                        | 94.20%             |
|             | 75.2 (5 C)                                            | 61.2 (5 C)                                        | 81.40%             |
| NLNBMMO-10% | 87.4 (1 C)                                            | 81.6 (1 C)                                        | 93.30%             |
|             | 63.4 (5 C)                                            | 50.1 (5 C)                                        | 78.80%             |

**Table S3:** The equation relationship between peak current and scan of NLNMO and NLNBMMO-5%

| Sample     | Charge process        | Discharge process      |
|------------|-----------------------|------------------------|
| NLNMO      | $Y=0.00615x-2.707E-5$ | $Y=-0.00566x+2.845E-5$ |
| NLNBMMO-5% | $Y=0.00673x-3.153E-5$ | $Y=-0.00542x+2.504E-5$ |

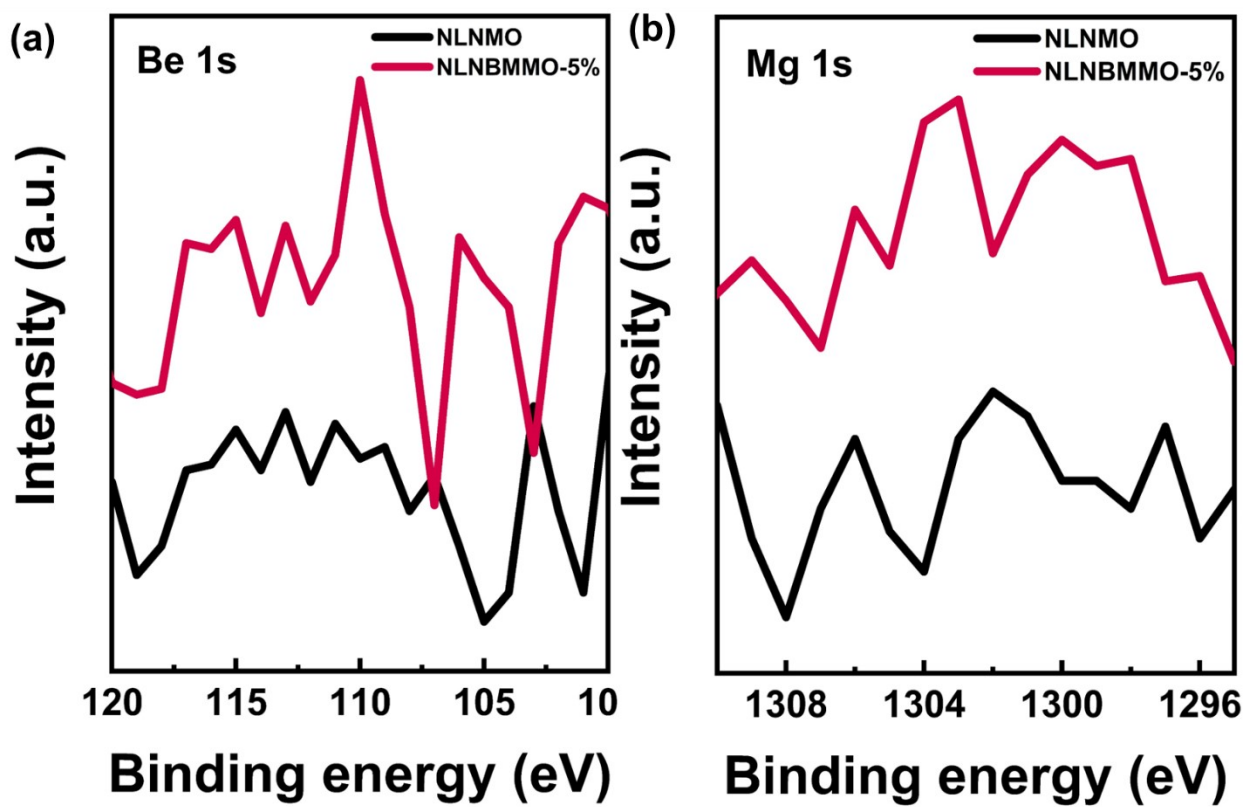

**Fig. S1:** (a) The Be 1s XPS spectra for NLNMO and NLNBMMO-5% (b) The Mg 1s XPS spectra for

NLNMO and NLNBMMO-5%

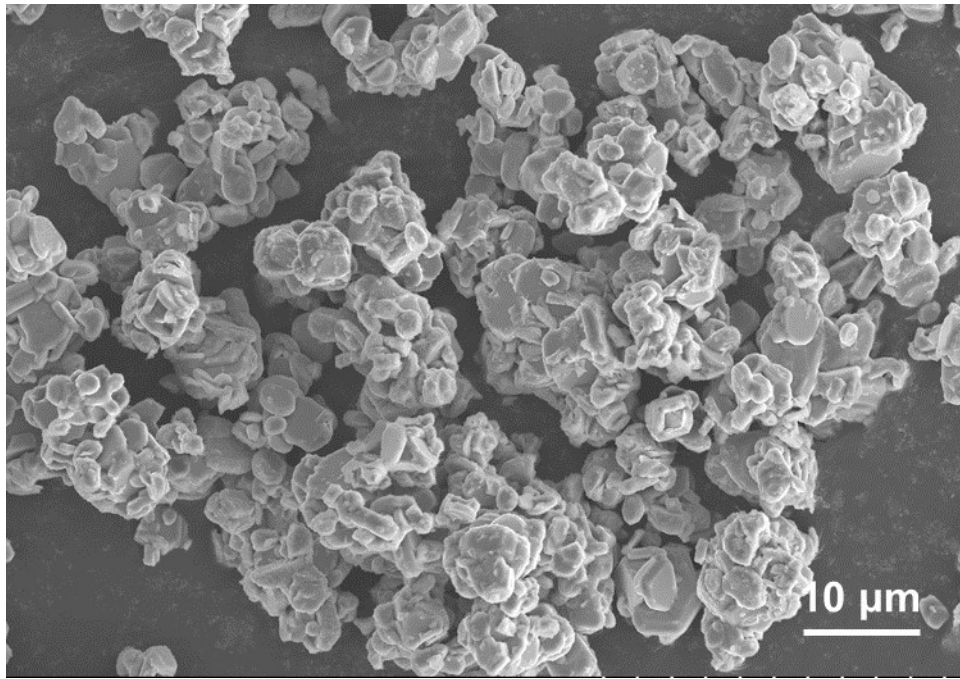

**Fig. S2:** The SEM image of NLNMO

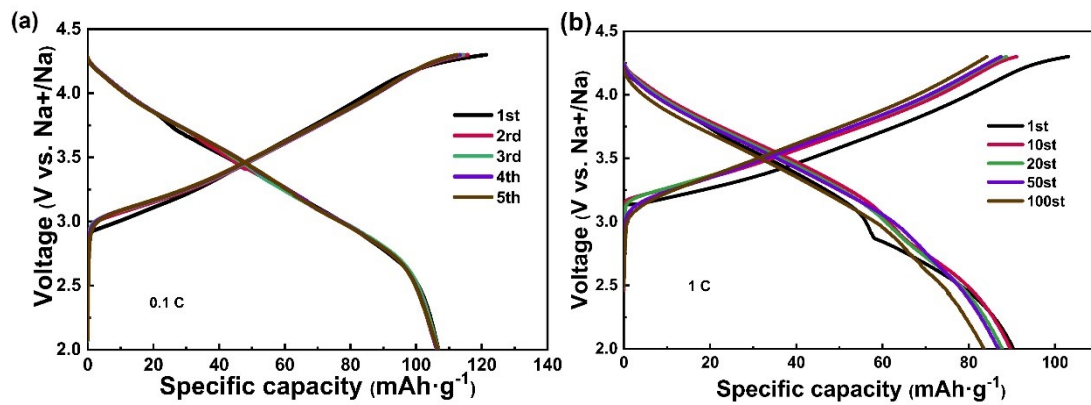

**Fig. S3:** (a) Galvanostatic charge-discharge profiles at 0.1 C of NLNBMMO-10% during the first 5 cycles. (b) Galvanostatic charge-discharge profiles at 1 C of NLNBMMO-10% for the 1st, 10st, 20st, 30st, and 50st cycle.

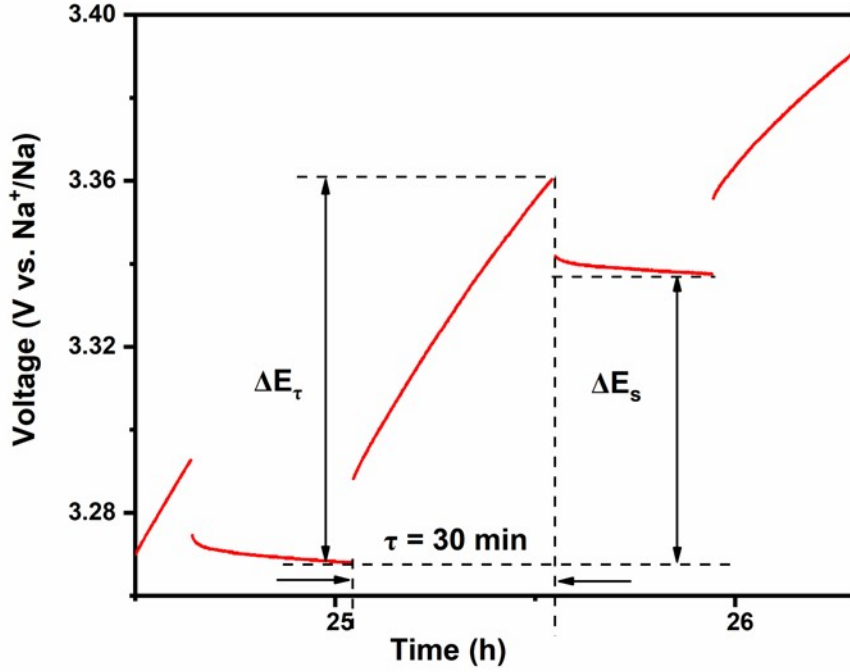

**Fig. S4:** Schematic illustration of selected steps of GITT test for NNMO-ZM with a charge/discharge time of 30 min.

Based on the GITT measurement, the  $\text{Na}^+$  diffusion coefficient can be calculated by Equation S1:

$$D_{\text{Na}^+} = \frac{4}{\pi\tau} \left( \frac{m_B V_M}{M_B S} \right)^2 \left[ \frac{\Delta E_s}{\Delta E_t} \right]^2 \quad \text{S1}$$

where  $D_{\text{Na}^+}$  ( $\text{cm}^2 \text{s}^{-1}$ ) represents the  $\text{Na}^+$  diffusion coefficient,  $V_M$  ( $\text{cm}^3 \text{mol}^{-1}$ ),  $m_B$ , and  $M_B$  are the molar volume, weight, and molar weight of the active materials, respectively,  $S$  and  $\tau$ (s) denote the surface area of the electrode and the testing time in each step, and  $\Delta E_s$  and  $\Delta E_t$  are the quasi-equilibrium potential and the change in cell voltage  $E$  during the current pulse, respectively.<sup>1-4</sup>



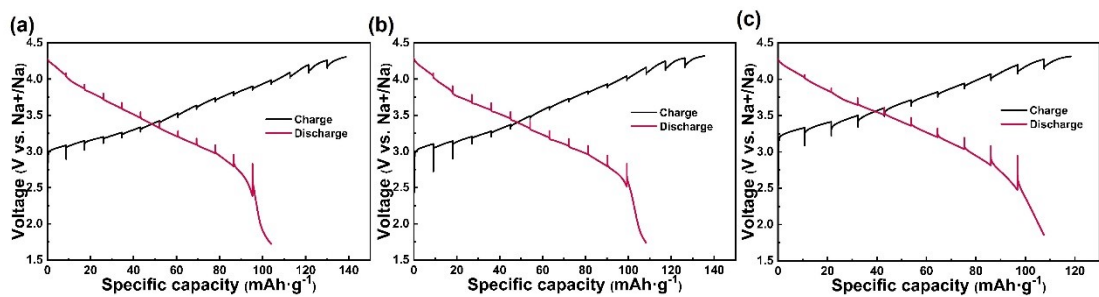

**Fig. S5:** (a-c) GITT curves of NLNMO, NLNBMMO-5% and NLNBMMO-10%.

## Reference

1. Y. Wang, Q. Wang, X. Ding, M. Wang, Y. Xin and H. Gao, *Applied Surface Science*, 2022, **601**, 154218.
2. Q. Wang, X. Ding, J. Li, H. Jin and H. Gao, *Chemical Engineering Journal*, 2022, **448**, 137740.
3. M. Wang, Q. Wang, X. Ding, Y. Wang, Y. Xin, P. Singh, F. Wu and H. Gao, *Interdisciplinary Materials*, 2022, **1**, 373-395.
4. Q. Wang, C. Ling, J. Li, H. Gao, Z. Wang and H. Jin, *Chemical Engineering Journal*, 2021, **425**, 130680.
